# Supplementary material for: Biomarker potential of nuclear Nrf2 activation in the ABC subtype of diffuse large B‑cell lymphoma
Source: PubMed Central journal article supplement — Oncol Lett. 2024 Oct 25;29(1):30. doi: 10.3892/ol.2024.14776 (PMC11542154; doi:10.3892/ol.2024.14776), 2024-10-25

Figure S1. Cytoplasmic Nrf2, Keap1, LC3B and nitrotyrosine expression in diffuse large B-cell lymphoma samples via immunohistochemistry and the TissueFAXS PLUS system. The ratio of expression cells was quantified using HistoQuest software. Nrf2, nuclear factor erythroid 2-related factor 2; Keap1, kelch-like ECH-associated protein 1; LC3B, microtubule-associated protein 1 light chain 3 $\beta$ .

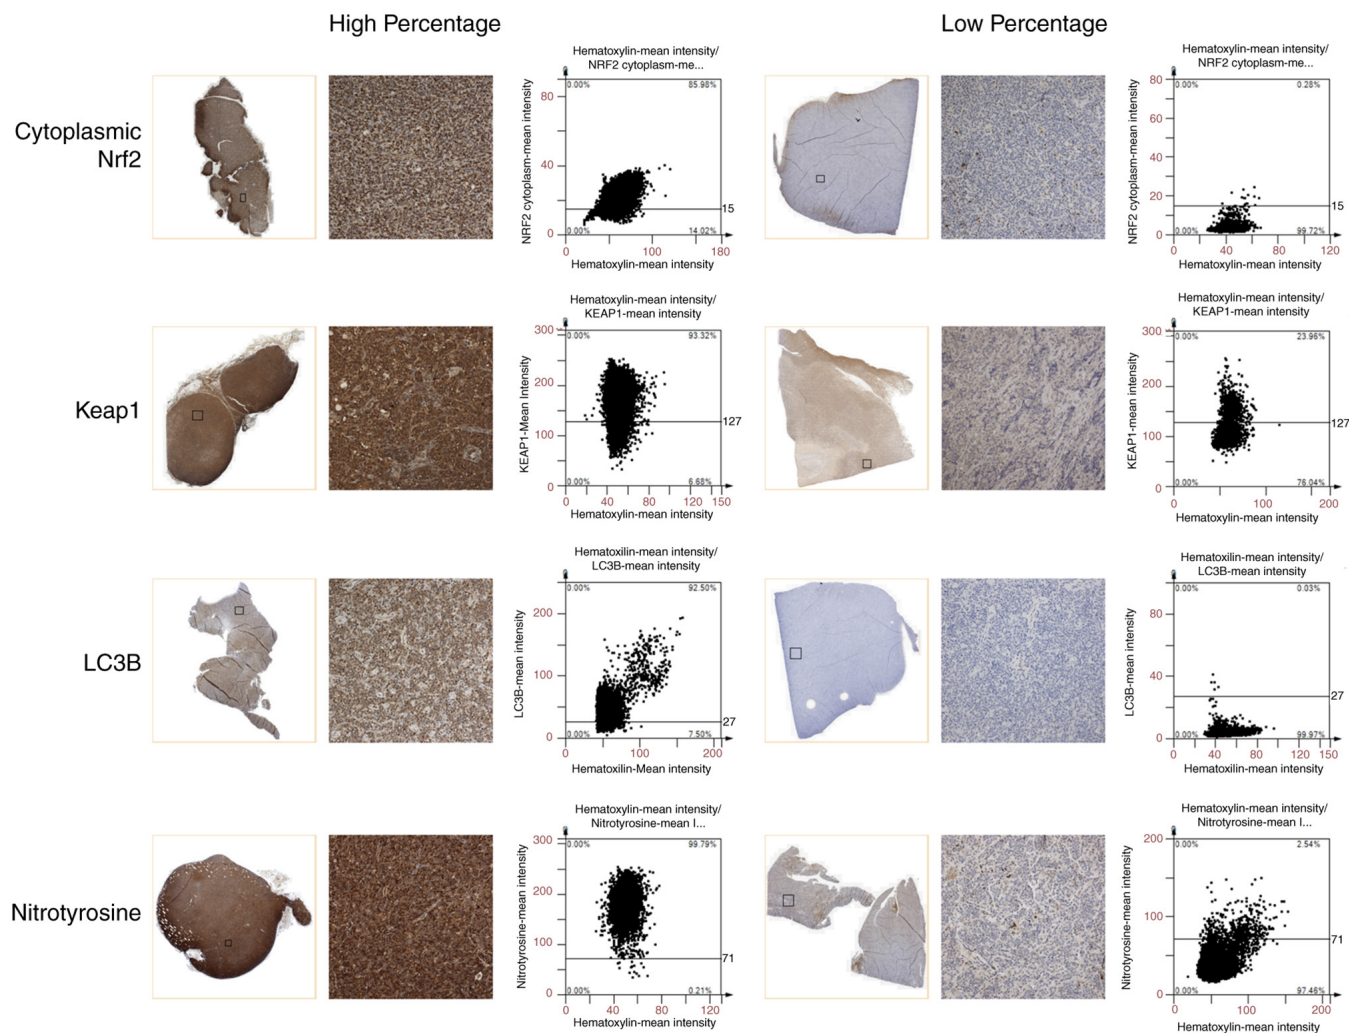

Figure S2. Gene expression profiles of different tumor and paired normal tissue samples, with each dot representing the expression data of an individual sample. mRNA expression levels of the NFE2L2 gene are markedly higher in GBM, LGG, PAAD and THYM compared with normal tissues (indicated in red). Conversely, in BLCA and OV (indicated in green), the NFE2L2 expression levels in tumor tissues are notably lower than those in normal tissues. NFE2L2, nuclear factor erythroid 2-related factor 2; TPM, transcripts per million; T, tumor; N, normal; ACC, adrenocortical carcinoma; BLCA, bladder urothelial carcinoma; BRCA, breast invasive carcinoma; CESC, cervical squamous cell carcinoma and endocervical adenocarcinoma; CHOL, cholangio carcinoma; COAD, colon adenocarcinoma; DLBC, lymphoid neoplasm diffuse large B-cell lymphoma; ESCA, esophageal carcinoma; GBM, glioblastoma multiforme; HNSC, head and neck squamous cell carcinoma; KICH, kidney chromophobe; KIRC, kidney renal clear cell carcinoma; KIRP, kidney renal papillary cell carcinoma; LAML, acute myeloid leukemia; LGG, brain lower grade glioma; LIHC, liver hepatocellular carcinoma; LUAD, lung adenocarcinoma; LUSC, lung squamous cell carcinoma; MESO, mesothelioma; OV, ovarian serous cystadenocarcinoma; PAAD, pancreatic adenocarcinoma; PCPG, pheochromocytoma and paraganglioma; PRAD, prostate adenocarcinoma; READ, rectum adenocarcinoma; SARC, sarcoma; SKCM, skin cutaneous melanoma; STAD, stomach adenocarcinoma; TGCT, testicular germ cell tumors; THCA, thyroid carcinoma; THYM, thymoma; UCEC, uterine corpus endometrial carcinoma; UCS, uterine carcinosarcoma; UVM, uveal melanoma

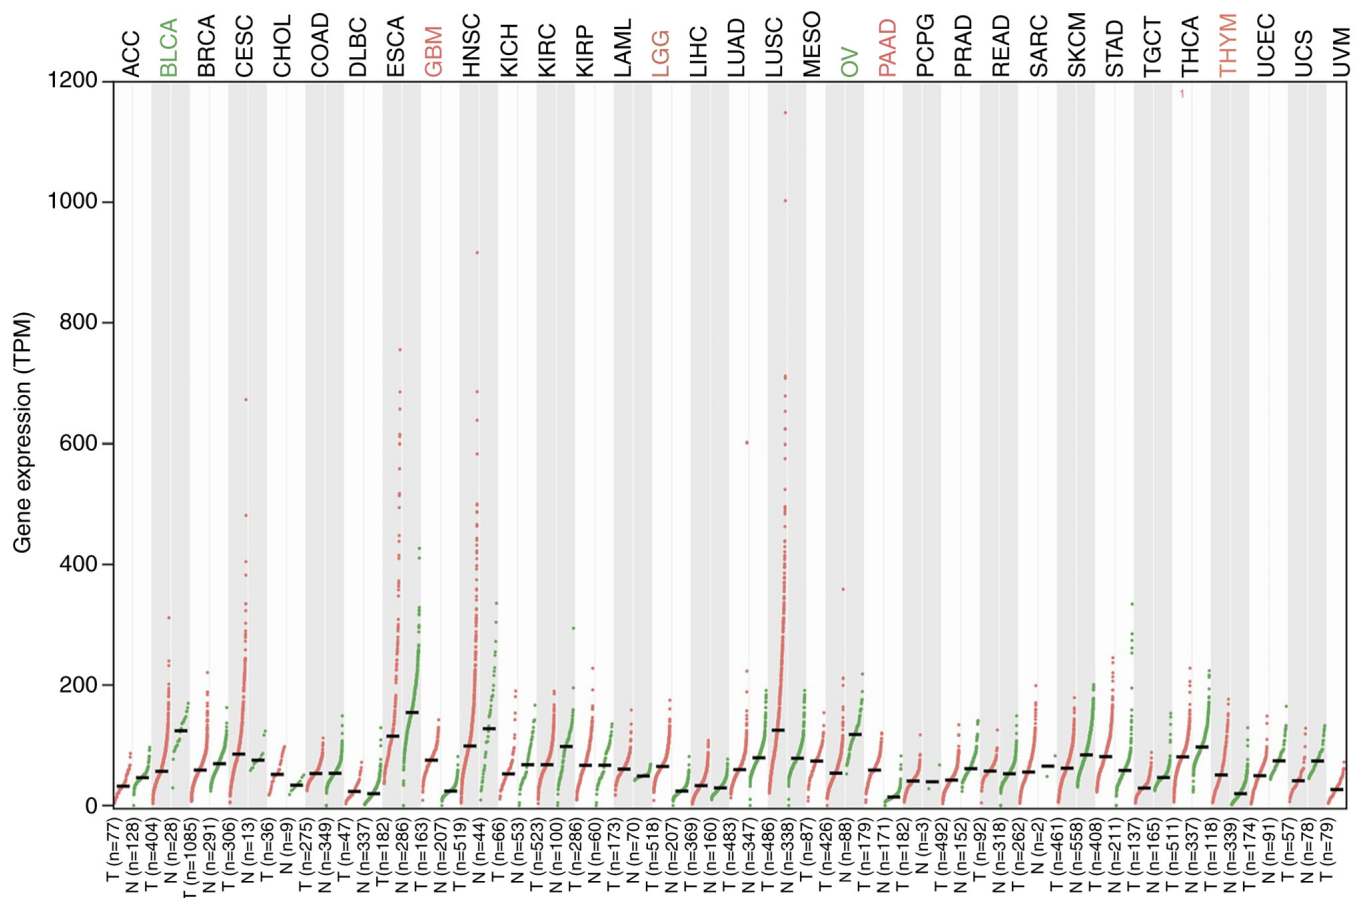

Supplement: Supplementary_Data.pdf [file Supplementary_Data.pdf]
